## Main Manuscript for

# CITED2 is a Conserved Regulator of the Uterine-Placental Interface

Marija Kuna,<sup>1¶</sup> Pramod Dhakal,<sup>1¶†</sup> Khursheed Iqbal,<sup>1</sup> Esteban M. Dominguez,<sup>1</sup> Lindsey N. Kent,<sup>1‡</sup> Masanaga Muto,<sup>1\*</sup> Ayelen Moreno-Irusta,<sup>1</sup> Keisuke Kozai,<sup>1§</sup> Kaela M. Varberg,<sup>1</sup> Hiroaki Okae,<sup>2</sup> Takahiro Arima,<sup>2</sup> Henry M. Sucoy,<sup>3</sup> and Michael J. Soares<sup>1,4,5\*</sup>

<sup>1</sup>Institute for Reproductive and Developmental Sciences, Department of Pathology and Laboratory Medicine, University of Kansas Medical Center, Kansas City, KS

<sup>2</sup>Department of Informative Genetics, Environment and Genome Research Center, Tohoku University Graduate School of Medicine, Sendai 980-8575, Japan

<sup>3</sup>Department of Regenerative Medicine and Cell Biology and Division of Cardiology, Department of Medicine, Medical University of South Carolina, Charleston, SC

<sup>4</sup>Department of Obstetrics and Gynecology, University of Kansas Medical Center, Kansas City, KS

<sup>5</sup>Center for Perinatal Research, Children's Research Institute, Children's Mercy, Kansas City, MO

¶Authors made equal contributions to the manuscript

†Present address: Eurofins BioPharma, Columbia, MO

‡Present address: Center for Reproductive Health Sciences, Department of Obstetrics and Gynecology, Washington University School of Medicine, St. Louis, MO

\*Present address: Department of Stem Cells and Human Disease Models, Research Center for Animal Life Science, Shiga University of Medical Science, Seta, Tsukinowa-cho, Otsu, Shiga 520-2192, Japan

§Present address: Department of Obstetrics and Gynecology, University of Missouri-Kansas City School of Medicine, Kansas City, MO

\*Corresponding authors: Marija Kuna and Michael J. Soares

**Email:** [mkuna@kumc.edu](mailto:mkuna@kumc.edu) or [msoares@kumc.edu](mailto:msoares@kumc.edu)

**Author Contributions:** MK, PD, KI, and MJS conceived and designed the research; MK, PD, KI, EMD, LNK, MM, AM-I, KK, KMV performed experiments; HO, TA provided reagents. MK, PD, KI, HMS., and MJS analyzed the data and interpreted results of experiments; MK, PD, and MJS prepared figures and manuscript; All authors read, contributed to editing, and approved the final version of manuscript.

**Competing Interest Statement:** There is no conflict of interest that could be perceived as prejudicing the impartiality of the research reported.

**Classification:** Biological Sciences, Developmental Biology

**Keywords:** CITED2, placenta, trophoblast, pregnancy, stem cells

**This PDF file includes:**

Main Text  
Figures 1 to 6

## 2 Abstract

3 Establishment of the hemochorial uterine-placental interface requires exodus of trophoblast cells  
4 from the placenta and their transformative actions on the uterus, which represent processes  
5 critical for a successful pregnancy, but are poorly understood. We examined the involvement of  
6 CBP/p300-interacting transactivator with glutamic acid/aspartic acid-rich carboxyl terminal domain  
7 2 (**CITED2**) in rat and human trophoblast cell development. The rat and human exhibit deep  
8 hemochorial placentation. CITED2 was distinctively expressed in the junctional zone and invasive  
9 trophoblast cells of the rat. Homozygous *Cited2* gene deletion resulted in placental and fetal  
10 growth restriction. Small *Cited2* null placentas were characterized by disruptions in the junctional  
11 zone, delays in intrauterine trophoblast cell invasion, and compromised plasticity. In the human  
12 placentation site, CITED2 was uniquely expressed in the extravillous trophoblast (**EVT**) cell  
13 column and importantly contributed to development of the EVT cell lineage. We conclude that  
14 CITED2 is a conserved regulator of deep hemochorial placentation.

## 15 Significance Statement

16 The process of establishing the uterine-placental interface is a poorly understood tissue re-  
17 engineering event that involves genetically foreign trophoblast cells breaching the  
18 immunologically secure uterus. When optimal, mother and fetus thrive, whereas failures  
19 represent the root cause of life-threatening diseases of pregnancy. CBP/p300-interacting  
20 transactivator with glutamic acid/aspartic acid-rich carboxyl terminal domain 2 (**CITED2**) is a  
21 transcriptional co-regulator with a conspicuous presence in trophoblast cell lineages infiltrating  
22 the uterine parenchyma. CITED2 helps coordinate the differentiation of rat and human  
23 trophoblast cells into invasive/extravillous trophoblast cells capable of transforming the uterus.  
24 These actions ensure requisite placental development and adaptations to physiological stressors.  
25 CITED2 exemplifies a conserved regulator of transcriptional events essential for establishing the  
26 uterine-placental interface.

27

28

## 29 Main Text

30

### 31 Introduction

32

33 The hemochorial placenta creates an environment essential for survival and development of the  
34 fetus (1–3). Several essential tasks are accomplished by the placenta. Trophoblast, the  
35 parenchymal cell lineage of the placenta, specializes into cell types facilitating the flow of  
36 nutrients into the placenta and their transfer to the fetus (3, 4). Fundamental to this process is the  
37 differentiation of trophoblast cells with the capacity to enter and transform uterine tissue proximal  
38 to the developing placenta, and restructure uterine vasculature (3, 4). Intrauterine trophoblast cell  
39 invasion and trophoblast cell-guided uterine transformation are highly developed in the human  
40 and the rat, unlike the mouse (5, 6). In the human, these cells are referred to as extravillous  
41 trophoblast (**EVT**) cells and the generic term, invasive trophoblast cells, is used to identify these  
42 cells in the rat. Failure of trophoblast cell-directed uterine transformation has negative  
43 consequences for mother and fetus (4). Invasive trophoblast cell progenitors arise from structures  
44 designated as the EVT cell column and the junctional zone in the human and rat, respectively (7).  
45 The EVT cell column is a well-defined structure containing a stem/proliferative population of  
46 trophoblast cells (cytotrophoblast) situated at the base of the column with a linear progression of  
47 EVT progenitor cells located within the core of the column proceeding to various stages of  
48 maturing EVT cells positioned at the distal region of the column (4). In contrast, the junctional  
49 zone is more complex, giving rise to endocrine cells (trophoblast giant cells and  
50 spongiotrophoblast cells), energy reservoirs (glycogen trophoblast cells), and invasive trophoblast

51 progenitor cells (6, 8). Understanding cellular decision-making within the EVT cell column and  
52 junctional zone provides insights into the development of the invasive trophoblast cell lineage.

53  
54 CBP/p300 interacting transactivator, with Glu/Asp-rich carboxy terminal domain, 2 (**CITED2**) is a  
55 transcriptional co-regulator possessing the capacity to modulate interactions between DNA  
56 binding proteins and histone modifying enzymes, specifically transcription factor-CREB binding  
57 protein (**CREBBP** or **CBP**)/EIA binding protein p300 (**EP300**) interactions (9, 10). CBP and  
58 EP300 possess histone 3 lysine 27 (**H3K27**) acetyl transferase activity (11, 12) and have been  
59 implicated in trophoblast cell differentiation and their dysregulation linked to diseases of the  
60 placenta, including preeclampsia and intrauterine growth restriction (13, 14). The outcome of  
61 CITED2 actions is transcription factor specific. In some cases, CITED2 interferes with  
62 transcription factor-CBP/EP300 interactions and inhibits gene expression (e.g. hypoxia inducible  
63 factor, **HIF**) (15), while in other cases, CITED2 facilitates transcription factor-CBP/EP300  
64 recruitment and activates gene expression (e.g., Activator protein 2 family, **TFAP2**) (16). Both HIF  
65 and TFAP2C (also called **AP-2 $\gamma$** ) have essential roles in placentation (17–21). The connections  
66 between CITED2 and these molecular targets place CITED2 at key positions in the regulatory  
67 network controlling trophoblast cell development. In fact, mutagenesis of the mouse *Cited2* locus  
68 results in placental malformation (22, 23), along with a range of other embryonic defects,  
69 including prenatal lethality (15, 16, 24). Furthermore, CITED2 is prominently upregulated during  
70 rat trophoblast cell differentiation (25, 26), suggesting it may directly facilitate placental  
71 development.

72  
73 In this report, we explore the involvement of CITED2 in the regulation of trophoblast cell  
74 development and deep placentation using genetically manipulated rat models and trophoblast  
75 stem (**TS**) cells. *CITED2* is expressed in the junctional zone and invasive trophoblast cells of the  
76 rat placentation site. Disruption of *Cited2* results in compromised growth of the junctional zone,  
77 abnormalities in the invasive trophoblast cell lineage, dysregulation of TS cell differentiation, and  
78 abnormalities in adaptive responses to hypoxia and immune challenges. We also describe  
79 prominent phenotypic differences between mice and rats possessing *Cited2* null mutations.  
80 Importantly, we show that CITED2 is a conserved regulator of invasive trophoblast/EVT cell  
81 lineage decisions.

82

83

## 84 **Results**

85

### 86 ***Cited2* expression within the rat placentation site**

87 We started our investigation of the involvement of CITED2 in deep placentation by examining  
88 *Cited2* expression in the rat. The rat placentation site is organized into three well-defined  
89 compartments (labyrinth zone, junctional zone, and uterine-placental interface) that can be  
90 enriched by dissection (**Fig. 1A**). The labyrinth zone is situated at the placental-fetal interface  
91 adjacent to the junctional zone, which borders the uterine parenchyma. As gestation progresses,  
92 invasive trophoblast cells detach from the junctional zone and infiltrate the uterine parenchyma,  
93 establishing a structure we define as the uterine-placental interface, which has also been called  
94 the metrial gland (6, 7). Reverse transcription-quantitative polymerase chain reaction (**RT-qPCR**)  
95 measurements demonstrated abundant expression of *Cited2* transcripts in the junctional zone,  
96 which was far greater than any other tissue analyzed (**Fig. 1B**). Expression of *Cited2* increased in  
97 the junctional zone and uterine-placental interface as gestation progressed (**Fig. 1C and D**).  
98 Localization of *Cited2* transcripts confirmed their presence in the junctional zone and within invasive  
99 trophoblast cells of the uterine-placental interface (**Fig. 1E**). The latter was demonstrated by co-  
100 localization of *Cited2* and *Prl7b1* transcripts. *Prl7b1* is an established marker of the invasive  
101 trophoblast cell lineage of the rat (27). Thus, *Cited2* is present in compartments of the placentation  
102 site critical to the derivation (junctional zone) and functioning of invasive trophoblast cells (uterine-  
103 placental interface).

104

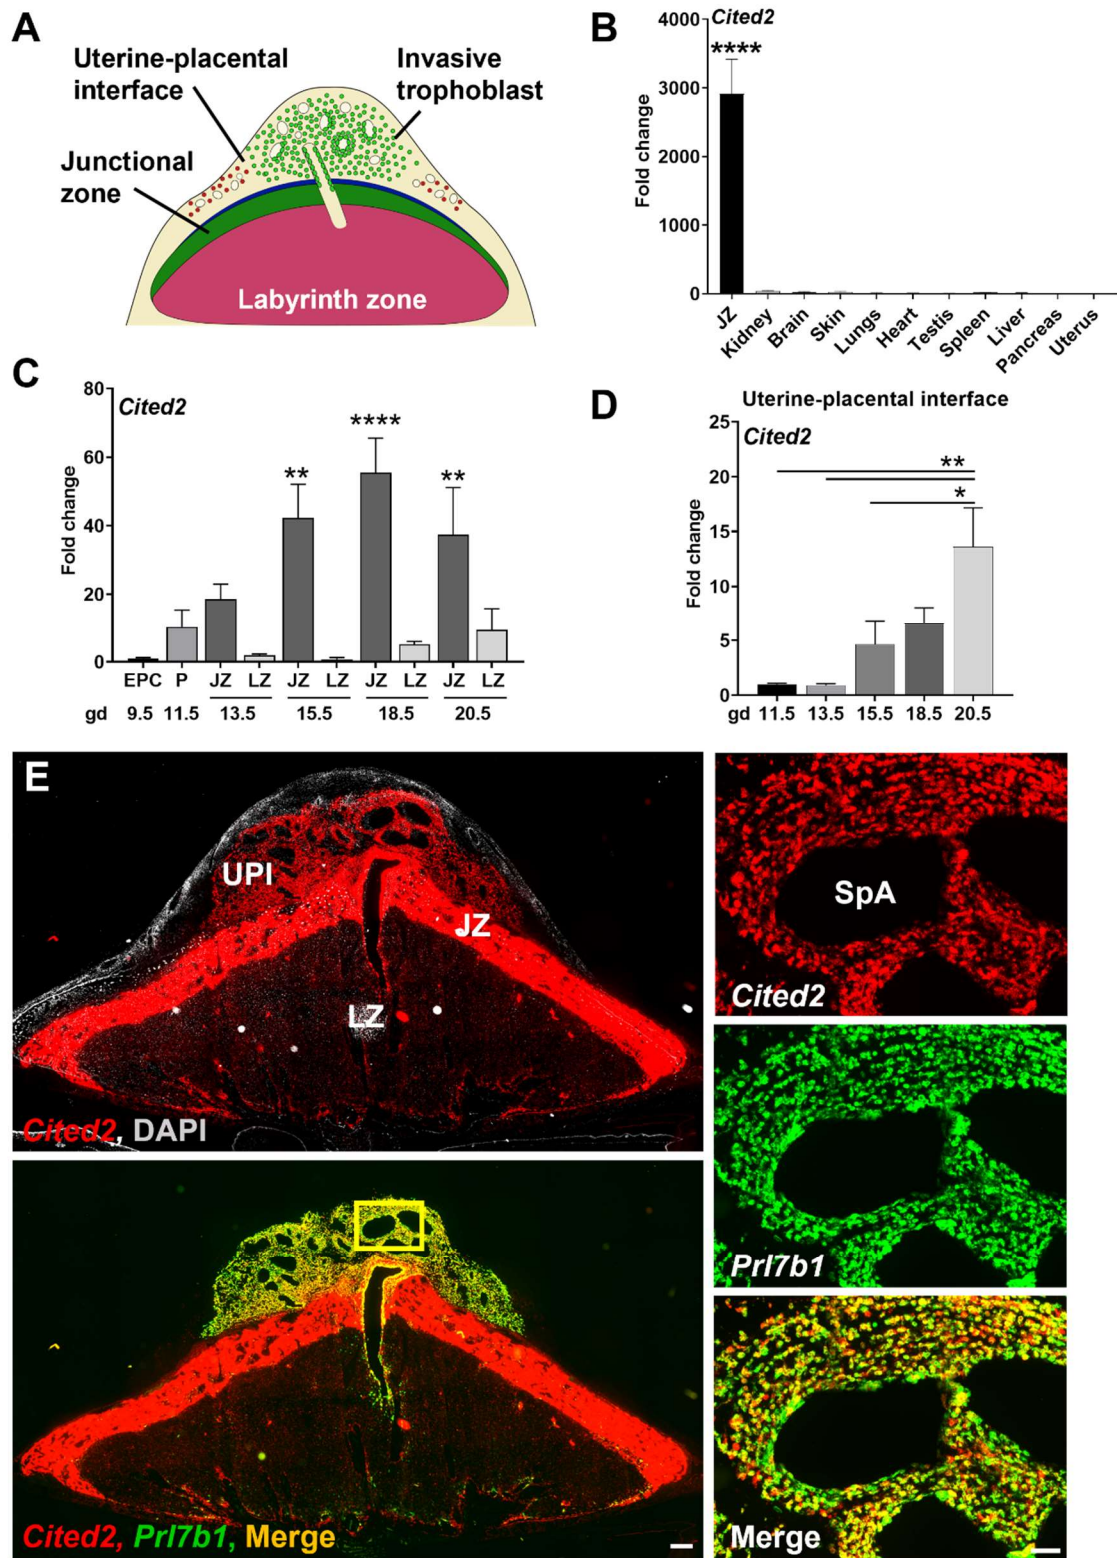

105  
106  
107

Figure 1. *Cited2* expression in the placenta and uterine-placental interface during gestation in the rat. A. Schematic showing the late gestation rat placentation site. Invaded



108 trophoblast cells are depicted in green. **B.** Relative expression of *Cited2* transcript in postnatal  
109 day 1 (**PND1**) rat neonatal tissues and gestation day (**gd**) 14.5 junctional zone (**JZ**) tissue. **C.**  
110 Relative expression of *Cited2* transcripts in the ectoplacental cone (**EPC**), whole placenta (**P**), JZ,  
111 and labyrinth zone (**LZ**) of the rat placenta during gestation. Values depicted were normalized to  
112 gd 9.5 EPC samples. **D.** Relative expression of *Cited2* transcripts within the uterine-placental  
113 interface during gestation. **E.** *In situ* hybridization showing *Cited2* transcript distribution (top left)  
114 and *Cited2* and *Pr17b1* (invasive trophoblast marker) transcript co-localization in rat gd 18.5  
115 placentation site (bottom left). Higher magnification images of the area outlined by a yellow  
116 rectangle (bottom left) are shown to the right. Scale bar=500  $\mu$ m (left panels), scale bar=100  $\mu$ m  
117 (right panels). Uterine-placental interface (**UPI**), spiral artery (**SpA**). The histograms presented in  
118 panels **B**, **C**, and **D** represent means  $\pm$  SEM, n=5-10, 3-6 pregnancies. One-way ANOVA,  
119 Tukey's post hoc test, \* p < 0.05, \*\* p < 0.01, \*\*\*\* p<0.0001.

120  
121

### 122 ***In vivo analysis following Cited2 disruption***

123 A global *Cited2* mutant rat model was generated using *CRISPR/Cas9* mediated genome-editing.  
124 Two guide RNAs were used to generate a 1477 bp nucleotide deletion, which removed the entire  
125 coding region of *Cited2* (**SI Appendix Fig. S1A and B**). The *Cited2* mutant allele was successfully  
126 transferred through the germline. Both male and female rats heterozygous for the *Cited2* mutation  
127 were viable and fertile. The absence of CITED2 protein in the placenta of homozygous mutants  
128 confirmed the gene disruption (**SI Appendix Fig. S1C**). Since *Cited2* null pups were not observed  
129 at weaning from heterozygous x heterozygous breeding, we hypothesized that *Cited2* null rats died  
130 in utero, as observed for *Cited2* mutant mice (15, 16, 24) or soon after birth. In contrast to the  
131 mouse, *Cited2* null mutant rats survived prenatal development and instead, died postnatally, within  
132 a few h of extrauterine life (**SI Appendix Fig. S1D**). This fundamental difference prompted a more  
133 detailed comparison of the effects of *Cited2* disruption in the rat versus the mouse. We obtained a  
134 well-characterized *Cited2* mutant mouse model, which also possessed a deletion of the entire  
135 coding sequence (**SI Appendix Fig. S1E**) (15). The *Cited2* mutation was transferred to an outbred  
136 CD1 mouse genetic background following backcrossing for >10 generations. It has been reported  
137 that disruption of the *Cited2* gene in the mouse results in fetal growth restriction and a range of  
138 developmental anomalies, including: i) cardiac abnormalities; ii) arrested lung development; iii)  
139 absence of adrenal glands, and iv) neural tube defects resulting in exencephaly (15, 16, 24, 28,  
140 29). Fetal rats possessing homozygous *Cited2* mutations exhibited heart and lung abnormalities  
141 (**SI Appendix Fig. S2A and B**) as previously reported for the mouse (15, 16, 28, 29). At embryonic  
142 day (**E**) 15.5, all *Cited2* null rat hearts examined possessed ventral septal defects and double outlet  
143 right ventricle and half showed a retroesophageal right subclavian artery (**SI Appendix Fig. S2A**)  
144 (30). Connections between abnormal placentation and fetal heart defects have been previously  
145 described (31–33). Postnatal day 1 lung development in *Cited2* homozygous mutant rats failed to  
146 progress and was arrested at the canicular stage (**SI Appendix Fig. S2B**) (34). Failures in heart  
147 and lung development are probable causes of death of *Cited2* nulls on the first day of extrauterine  
148 life. In contrast to the mouse, disruption of the *Cited2* gene in the rat showed no detectable adverse  
149 effects on adrenal gland or neural tube development (**SI Appendix Fig. S2C-G**). Thus, similarities  
150 and prominent differences exist in the phenotypes of rats versus mice with *Cited2* null mutations.

151  
152

### 152 ***CITED2 deficiency leads to placental growth restriction***

153 In the rat, global *Cited2* deficiency resulted in placental and fetal growth restriction starting at  
154 gestation day (**gd**) 14.5 and persisted through the end of gestation (**Fig. 2A**). Similar placental and  
155 fetal growth deficits were observed for the *Cited2* null mouse (**SI Appendix Fig. S3**), as previously  
156 reported (22). Both wild type and *Cited2* null rat placentas were organized into well-defined  
157 labyrinth and junctional zone compartments; however, each compartment was significantly smaller  
158 in *Cited2* null placentation sites (**Fig. 2B and C**). Genotype-dependent differences were not noted  
159 in the expression of proliferation or apoptotic markers in the gd 13.5 and 14.5 rat junctional zone  
160 (**SI Appendix Fig. S4**).

161

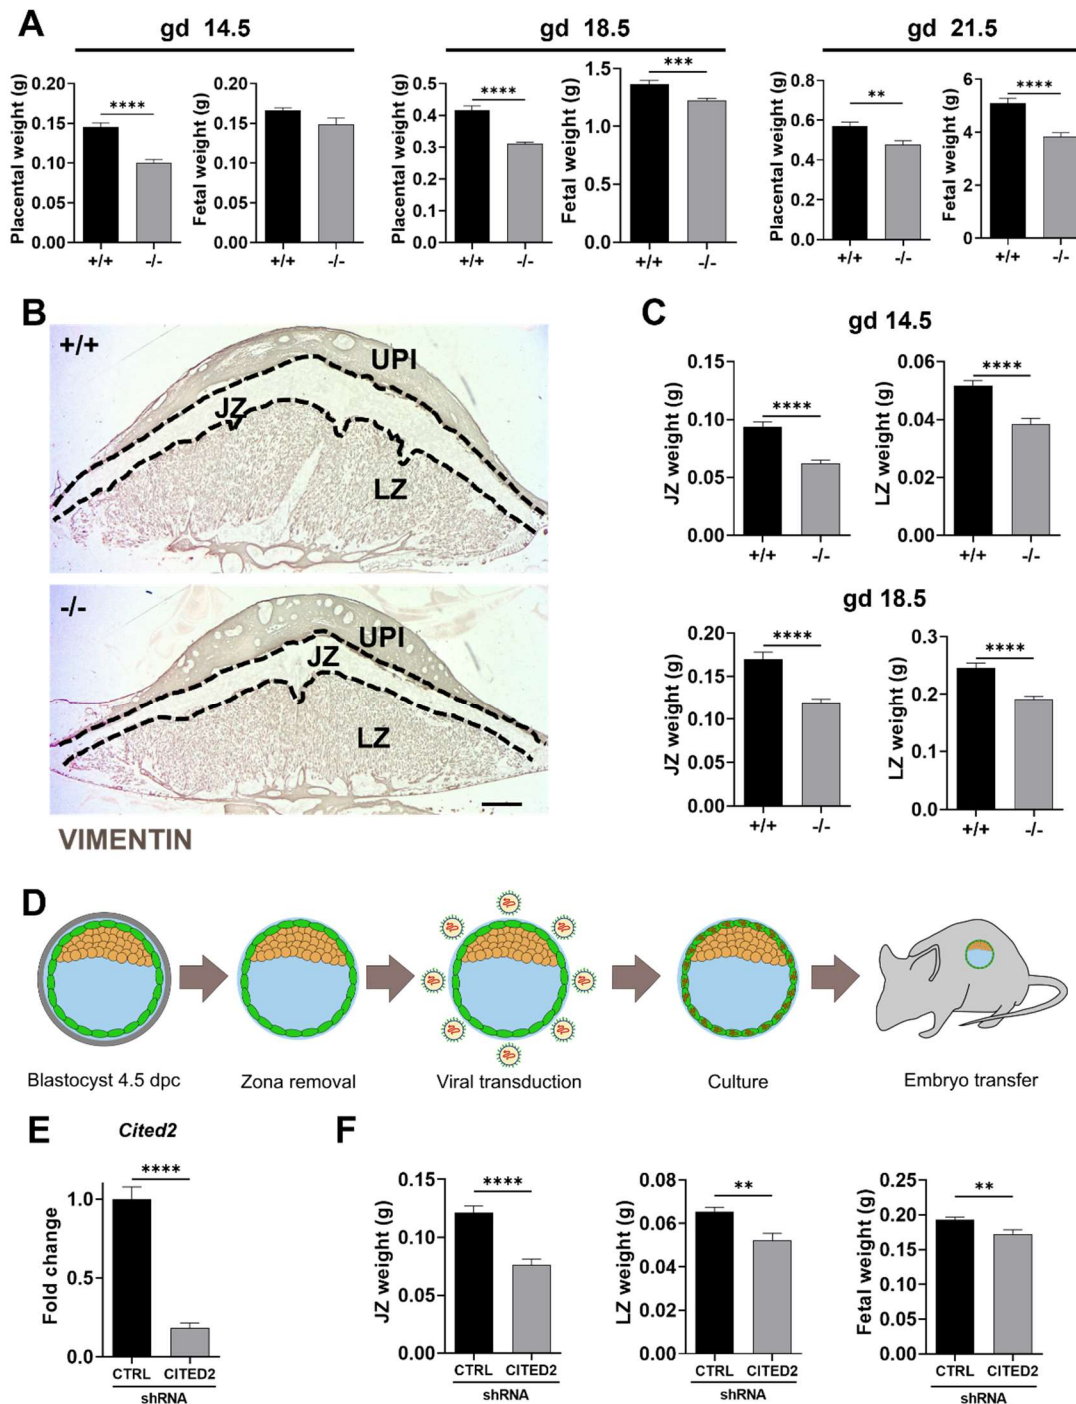

162  
163  
164  
165  
166  
167  
168  
169

**Figure 2. The CITED2 deficient rat placenta is growth restricted.** **A.** Placental and fetal weights from *Cited2*<sup>+/-</sup> x *Cited2*<sup>+/-</sup> breeding for the rat. **B.** Immunohistological analysis of vimentin in gestation day (gd) 18.5 wild type (+/+) and null (-/-) placentas from *Cited2*<sup>+/-</sup> x *Cited2*<sup>+/-</sup> breeding. Scale bar=1000 μm. **UPI**, uterine-placental interface, **JZ** junctional zone, **LZ** labyrinth zone. **C.** JZ and LZ weights from *Cited2*<sup>+/-</sup> x *Cited2*<sup>+/-</sup> breeding on gd 14.5 and gd 18.5. Values represent mean ± SEM, n=12-35, unpaired t-test, \*\*p<0.01, \*\*\*p<0.001, \*\*\*\* p<0.0001. **D.** Simplified schematic depicting the strategy for achieving trophoblast specific CITED2 knockdown

170 in vivo. **E.** Relative expression of *Cited2* transcripts in control (**CTRL**) and CITED2 shRNA-  
171 exposed gd 14.5 JZ tissue. **F.** JZ, LZ, and fetal weights from control and gd 14.5 trophoblast  
172 specific *Cited2* knockdown. Control (**CTRL**) and *Cited2* shRNA mediated knockdown. Shown are  
173 mean values  $\pm$  SEM, n=12-20, unpaired t-test, \*\*p<0.01, \*\*\*\* p<000.1.

174

175

176 Using trophoblast-specific lentiviral delivery (35) of *Cited2*-specific short hairpin RNAs (**shRNA**)  
177 (26), we determined that the effects of CITED2 on placental size and function were trophoblast-  
178 specific (**Fig. 2D-F**). *Cited2* shRNAs were transduced into trophectoderm of blastocysts.  
179 Transduced blastocysts were transferred into pseudopregnant female rats, and placental and fetal  
180 size evaluated at gd 14.5. Junctional zone, labyrinth zone, and fetal weights were significantly  
181 smaller in *Cited2* shRNA transduced trophoblast versus control shRNA transduced trophoblast  
182 (**Fig. 2F**).

183

184 The effects of CITED2 deficiency on the junctional zone could be viewed as a cell autonomous  
185 action, whereas growth defects in the labyrinth zone as a non-cell-autonomous action, potentially  
186 arising from deficits in the junctional zone or its derivatives, including invasive trophoblast cells and  
187 their actions in transforming the uterine parenchyma.

188

### 189 ***CITED2* deficiency affects gene regulatory networks in the junctional zone**

190 We next examined the potential cell-autonomous actions of CITED2 on junctional zone  
191 development. CITED2 is a known transcriptional co-regulator (9, 10), which prompted an  
192 examination of CITED2 deficiencies on the junctional zone gene regulatory network. RNA  
193 sequencing (**RNA-seq**) was performed on gd 14.5 wild type and *Cited2* null junctional zone tissues.  
194 A total of 203 differentially regulated transcripts were identified in the RNA-seq analysis, which  
195 included the downregulation of 160 transcripts and upregulation of 43 transcripts in CITED2  
196 deficient junctional zone tissue (**SI Appendix Fig. S5A-C, Dataset S1**). Among the downregulated  
197 transcripts were transcripts known to be prominently expressed in the junctional zone (e.g., *Mmp9*,  
198 *Igf2*, *Cyp11a1*, *Prl3d4*, *Prl8a9*). Surprisingly, an assortment of known interferon-responsive  
199 transcripts was upregulated in CITED2 deficient junctional zone tissues (e.g., *Irf2l2*, *Isg15*, *Oas1f*,  
200 *Ifitm3*; **SI Appendix Fig. S5C**). Pathway analysis supported roles for CITED2 in the regulation of  
201 cell migration and immune effector processes (**SI Appendix Fig. S5D**). Rat TS cells represent an  
202 excellent model for junctional zone development (36). *Cited2* transcript levels were dramatically  
203 upregulated following rat TS cell differentiation (**SI Appendix Fig. S6A**). Consequently, we derived  
204 rat TS cells from CITED2 deficient blastocysts and compared their behavior to wild type rat TS cells  
205 (**SI Appendix Fig. S6B-E**). Morphologies of wild type and *Cited2* null rat TS cells were similar in  
206 the stem state and following differentiation (**SI Appendix Fig. S6C**). CITED2 deficient TS cells  
207 grew slower than wild type rat TS cells (**SI Appendix Fig. S6D**) and exhibited dysregulated gene  
208 expression as determined by RT-qPCR (**SI Appendix Fig. S6E**). Interestingly, two transcripts  
209 known to regulate placental development, including the invasive trophoblast cell lineage, *Mmp9*  
210 and *Igf2* (37, 38), were similarly downregulated in CITED2 deficient rat TS cells (**SI Appendix Fig.**  
211 **S6E**).

212

### 213 ***CITED2* deficiency and invasive trophoblast cell development**

214 Trophoblast cells invade deep into the rat uterine parenchyma (5, 39). These intrauterine invasive  
215 trophoblast cells express *Cited2* (**Fig. 1E**), implicating CITED2 as a potential regulator of the  
216 development and/or function of the invasive trophoblast cell lineage. Early endovascular  
217 trophoblast cell invasion into the decidua at gd 13.5 was limited in *Cited2* nulls in comparison to  
218 wild type placentation sites; however, as gestation progressed differences in the extent of  
219 intrauterine trophoblast invasion was not evident between *Cited2* nulls and wild type placentation  
220 sites (**Fig. 3A-D**). The invasive trophoblast cell developmental delay characteristic of *Cited2* null  
221 placentation sites was evident at gd 15.5, as visualized by in situ hybridization for *Ceacam9* and  
222 *Prl7b1* (**Fig. 3C**). Prominent phenotypic differences in wild type and CITED2 deficient invasive  
223 trophoblast cells emerged from single cell RNA-seq (**scRNA-seq**) of the gd 18.5 uterine-placental

224 interface (**Fig. 4, SI Appendix Fig. S7A-E, Table S1, Datasets S2-S5**). The uterine-placental  
225 interface from gd 18.5 was selected to obtain sufficient number of invasive trophoblast cells for  
226 analysis. Uniform manifold approximation and projection (**UMAP**) profiles of the uterine-placental  
227 interface were similar to previously published UMAP profiles for the rat uterine-placental interface  
228 (40). *Cited2* expression was enriched in the invasive trophoblast cell cluster (**Fig. 4B**). Disruption  
229 of *CITED2* did not prevent the development of invasive trophoblast cells but altered their phenotype  
230 and their numbers (**Fig. 4C-E**). Among the differentially expressed invasive trophoblast cell  
231 transcript signatures sensitive to *CITED2* was signaling by Rho GTPases (**Fig. 4F**), which is  
232 fundamental to the regulation of cell migration and invasion (41). Transcripts encoding cell  
233 adhesion molecules (*CEACAM9*, *NCAM1*), proteins promoting cell migration (*CCDC88A*), ligands  
234 targeting the vasculature (*VEGFA*, *NPPB*), and interferon-responsive proteins (*IFITM3*, *IFI27L2B*,  
235 *IFI27*) were differentially expressed. Interestingly, *Dox11* was downregulated in the absence of  
236 *CITED2*. *DOXL1* is a paralog of *AOC1*, which encodes a diamine oxidase responsible for the  
237 oxidation of polyamines. *AOC1* is prominently expressed in EVT cells and is dysregulated in  
238 disorders such as preeclampsia (42). Collectively, the findings indicate that *CITED2* regulates the  
239 invasive trophoblast cell lineage.  
240



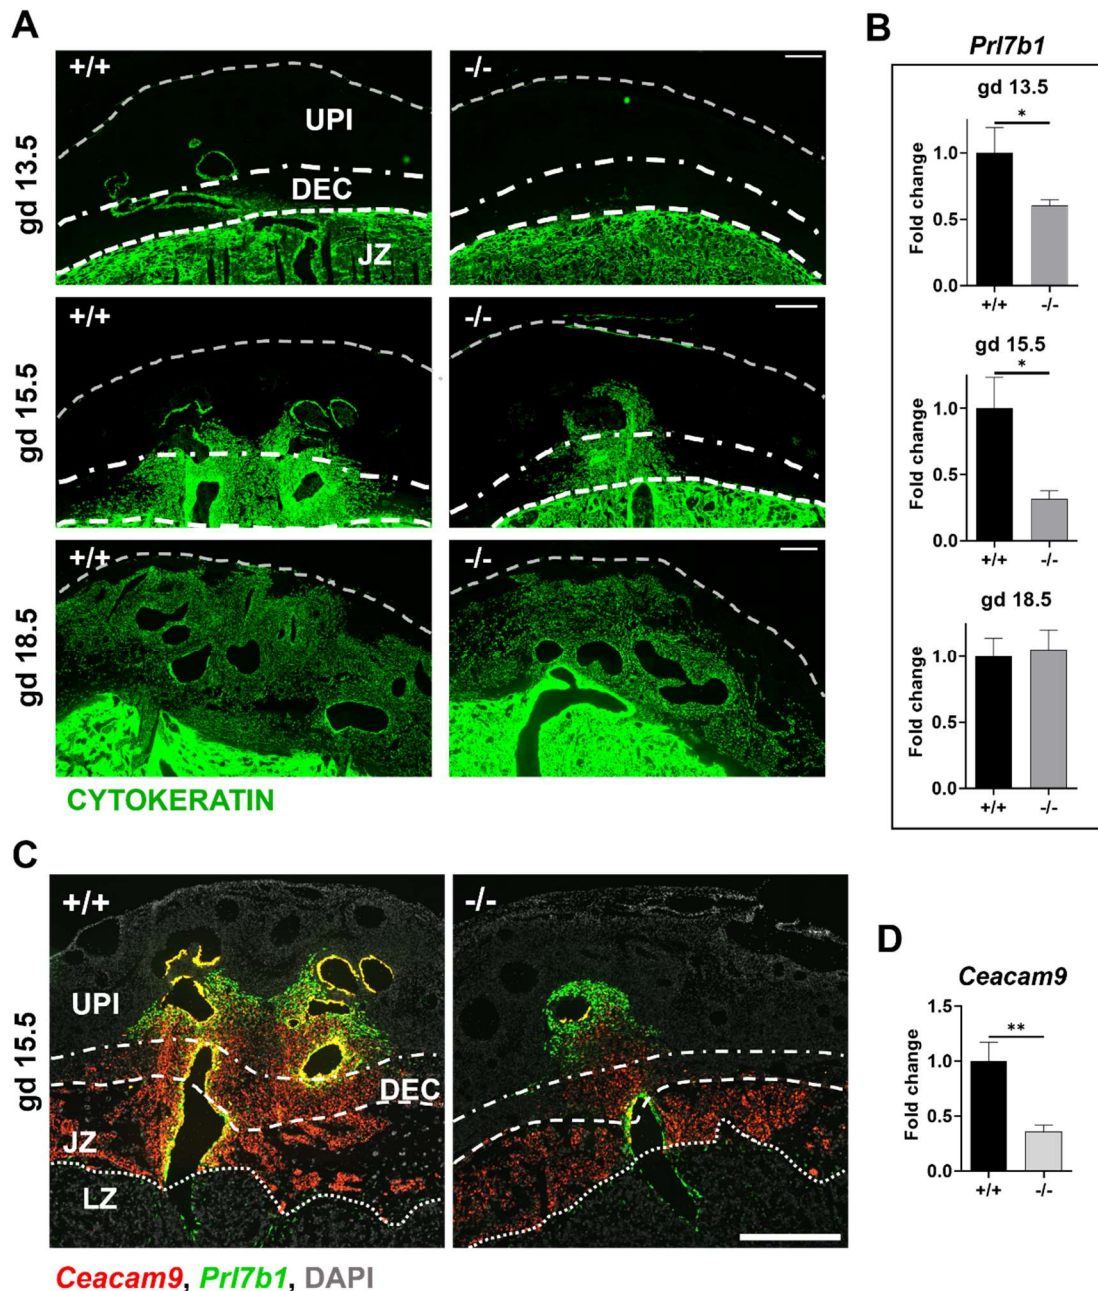

241

242

243 **Figure 3. Intrauterine trophoblast cell invasion is delayed in *Cited2* null rat placenta**

244 **sites. A.** Representative images of wild type (+/+) and *Cited2* null (-/-) rat gestation day (gd) 13.5,

245 15.5 and 18.5 placenta sites immunostained for cyokeratin (green). The cyokeratin

246 immunostain is specific to invasive trophoblast cells that have entered the uterine parenchyma.

247 Scale bars=500 μm. **B.** Relative expression of *Prl7b1* transcripts (invasive trophoblast cell

248 marker) from wild type (+/+) and *Cited2* null (-/-) gd 13.5 decidua and uterine placental

249 interface tissue at gd 15.5 and 18.5 measured by RT-qPCR. Graphs depict mean values ± SEM,

250 n=11-24, unpaired t-test, \*p<0.05. **C.** *In situ* hybridization showing *Ceacam9* (invasive trophoblast

251 cell marker, red) and *Prl7b1* (invasive trophoblast marker, green) transcript localization in gd 15.5

252 wild type (+/+) and *Cited2* null (-/-) rat placenta sites, scale bar=1000 μm. **D.** Relative

expression of *Ceacam9* transcripts (invasive trophoblast cell marker) in gd 15.5 uterine placental

253 interface tissue. Shown are mean values  $\pm$  SEM, n=12-14, unpaired t-test, \*\*p<0.01. Uterine  
 254 placental interface (UPI), decidua (DEC), junctional zone (JZ), labyrinth zone (LZ).  
 255  
 256

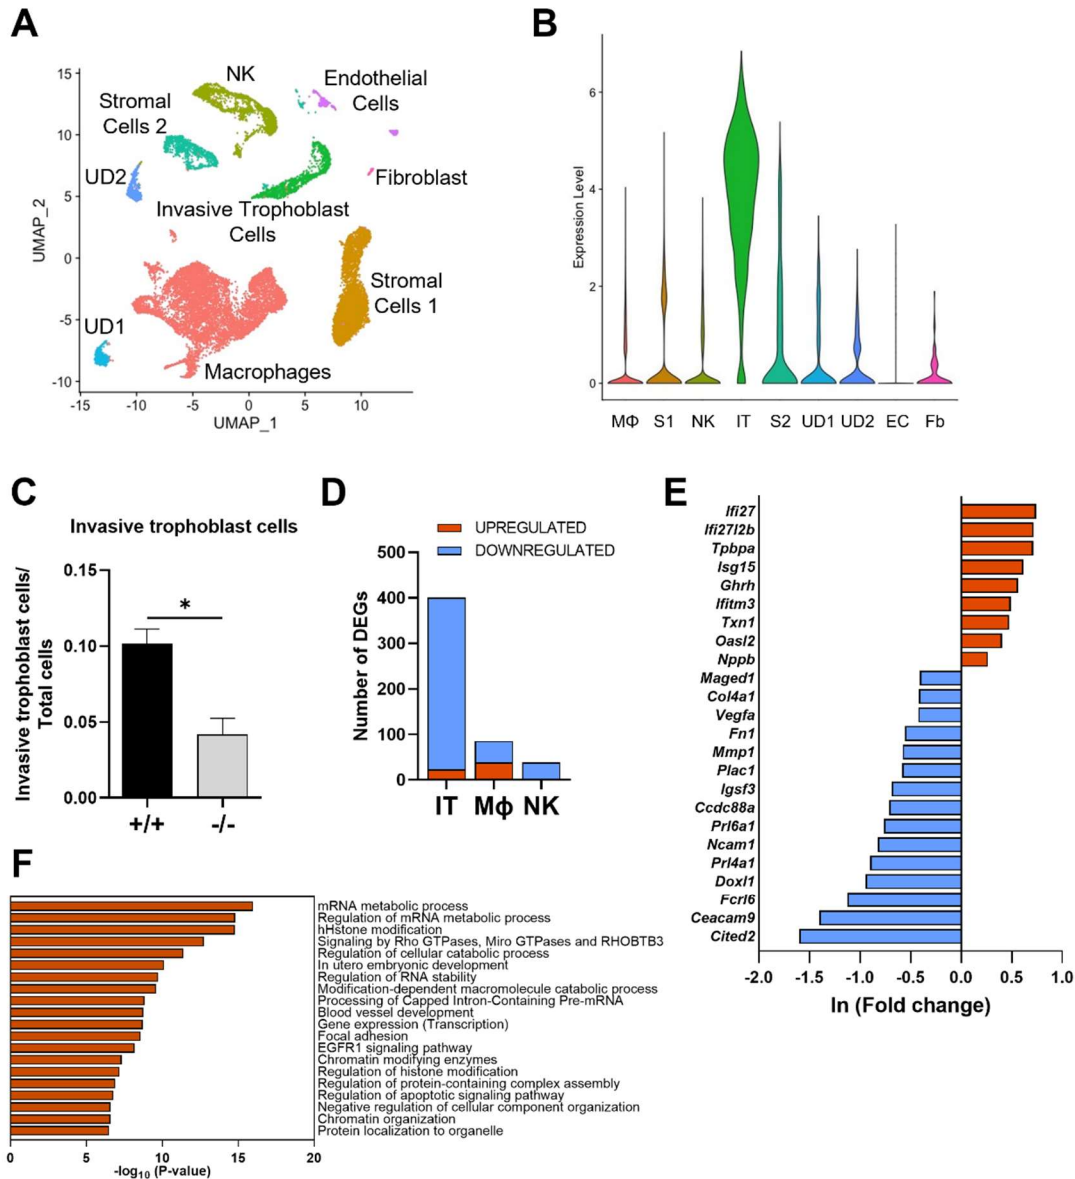

257 **Figure 4. CITED2 deficiency affects the rat invasive trophoblast cell phenotype.** Single cell-  
 258 RNA sequencing was performed on wild type (+/+) and *Cited2* null (-/-) gestation day (gd) 18.5  
 259 uterine-placental interface tissue samples. **A.** UMAP plot showing cell clustering in wild type (+/+) and  
 260 *Cited2* null (-/-) gd 18.5 uterine-placental interface tissue. **UD1**, undefined cell cluster 1; **UD2**,  
 261 undefined cell cluster 2. **B.** Violin plot showing expression of *Cited2* in each cell cluster. Cell  
 262 clusters: macrophages (MΦ) stromal 1 (S1), natural killer (NK) cells, invasive trophoblast (IT)  
 263 cells, stromal 2 (S2) cells, UD1, UD2, endothelial cells (EC), and fibroblasts (Fb). **C.** Ratio of  
 264 invasive trophoblast cells per total number of cells analyzed. Graph represents mean values  $\pm$   
 265 SEM, n=3, unpaired t-test, \*p<0.05. **D.** Number of differentially expressed genes (DEGs) for IT,  
 266 MΦ, and NK cells from wild type (+/+) versus *Cited2* null (-/-) uterine-placental interface tissue. **E.**  
 267 Bar plot showing select DEGs in the invasive trophoblast cell cluster (upregulated shown in red;  
 268

269 downregulated shown in blue). **F.** Gene Ontology enriched terms for DEGs from the invasive  
270 trophoblast cell cluster.

271

272 ***CITED2 and placentation site adaptations to physiological stressors***

273 Placentation sites possess the capacity to adapt to exposure to physiological stressors (3, 7).  
274 Hypoxia and polyinosinic:polycytidylic acid (**polyI:C**), a viral mimic, can elicit placental adaptations  
275 (43, 44). Hypoxia exposure elicits a prominent increase in endovascular trophoblast cell invasion  
276 (43), whereas polyI:C can disrupt placental and fetal development (44). CITED2 is involved in the  
277 regulation of adaptations elicited by exposure to hypoxia and inflammation (15, 45, 46). Therefore,  
278 we investigated responses of wild type versus CITED2 deficient placentation sites to physiological  
279 stressors.

280

281 Maternal hypoxia exposure from gd 6.5 to 13.5 was sufficient to overcome the delay in  
282 endovascular trophoblast cell invasion observed in CITED2 deficient placentation sites (**Fig. 5A-**  
283 **C**). Additionally, when exposed to hypoxia CITED2 deficient conceptus sites showed an increased  
284 resorption rate compared to their wild type littermates, indicating that without CITED2 the  
285 adaptations to hypoxia are compromised (**Fig. 5D**).

286

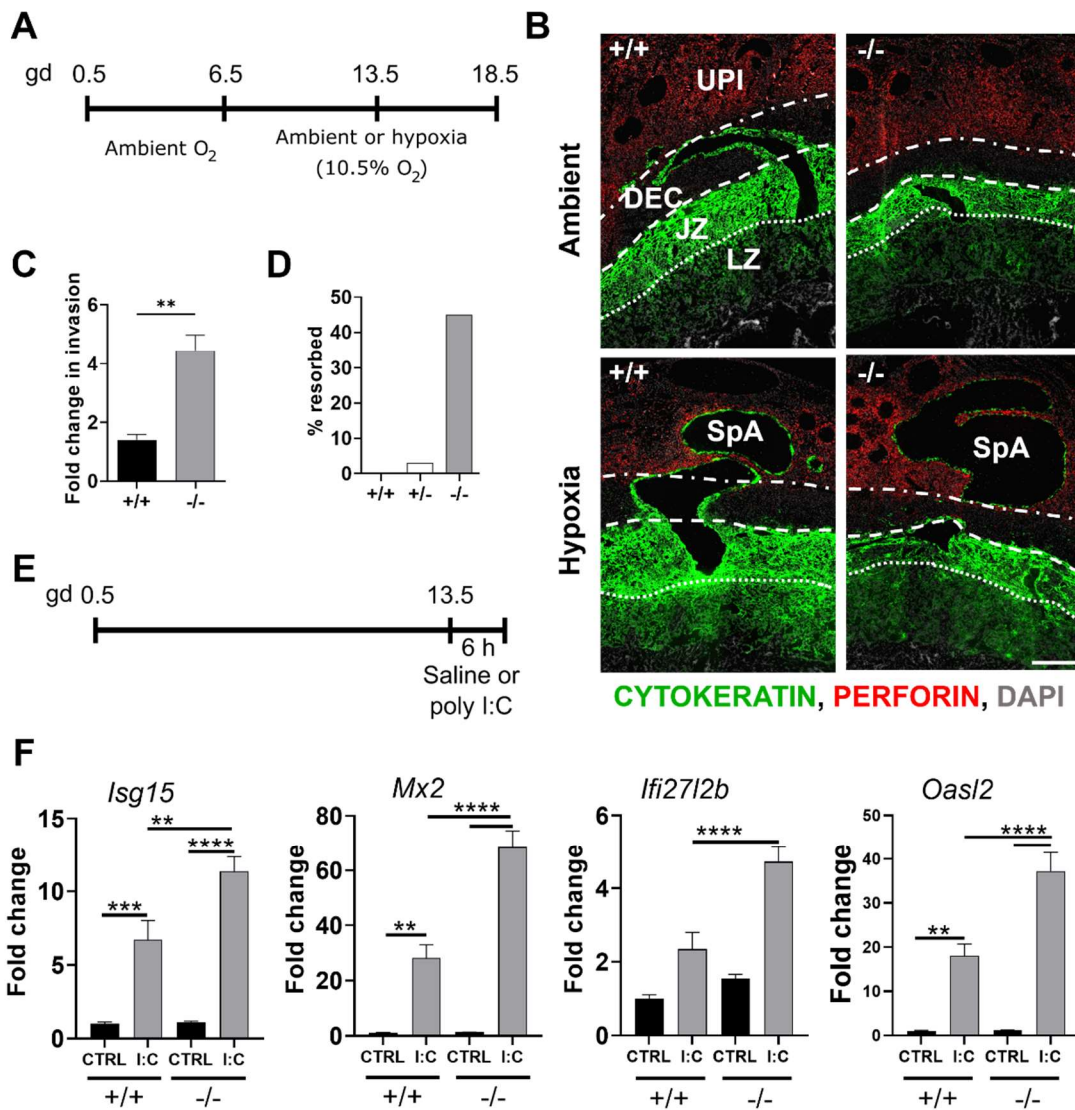

287  
288  
289  
290  
291  
292  
293  
294  
295  
296  
297  
298  
299  
300  
301  
302  
303

**Figure 5. CITED2 modulates rat placental responses to physiological stressors. A.** Schematic of the experimental timeline for hypoxia exposure. **B.** Representative images of wild type (+/+) and *Cited2* null (-/-) rat gestation day (gd) 13.5 placentation sites exposed to ambient or hypoxic (10.5% oxygen) conditions. Sections were immunostained for cytokeratin (green), perforin (red), and DAPI (blue). Scale bar=500  $\mu$ m. Uterine placental interface (UPI), decidua (DEC), junctional zone (JZ), labyrinth zone (LZ), and spiral artery (SpA). **C.** Depth of gd 13.5 endovascular trophoblast invasion was quantified, and fold changes calculated for hypoxic relative to ambient conditions, n=5-9. **D.** Resorption rate assessed on gd 18.5 for individual genotypes from *Cited2*<sup>+/-</sup> females bred to *Cited2*<sup>+/-</sup> males and exposed to ambient or hypoxic conditions, n=20-33. **E.** Schematic of the experimental timeline for polyinosinic:polycytidylic acid (polyI:C) treatment, **F.** Relative expression of *Isg15*, *Mx2*, *Ifi2712b*, and *Oasl2* in junctional zone tissue from control (saline treated; CTRL) and polyI:C exposed (I:C) wild type (+/+) and *Cited2* null (-/-) placentas; n=8-17. Shown are mean values  $\pm$  SEM, one-way analysis of variance, Tukey's post-hoc test. \*p<0.05, \*\*p<0.01, \*\*\*p<0.001, \*\*\*\*p<0.0001.



304 CITED2 deficiency was associated with upregulated expression of interferon-responsive transcripts  
305 in the junctional zone and invasive trophoblast cells (**Fig. 4E, SI Appendix Fig. S5, Dataset S1**),  
306 which implied that CITED2 could be involved in regulating responses to a viral challenge. We first  
307 determined the efficacy of a polyI:C challenge. PolyI:C treatment of pregnant rats resulted in  
308 significant increases in inflammatory transcript expression in the spleen and uterine-placental  
309 interface (**SI Appendix Fig. S8**). We then measured interferon-responsive transcripts in wild type  
310 and *Cited2* null junctional zone tissues recovered from *Cited2* heterozygous (*Cited2*<sup>+/-</sup>) pregnant  
311 female rats mated with *Cited2*<sup>+/-</sup> male rats and treated with either vehicle or polyI:C. CITED2  
312 deficiency resulted in an exaggerated response of interferon-responsive transcript expression in  
313 the junctional zone (**Fig. 5E and F**).

314  
315 Thus, CITED2 modulates junctional zone responses to physiological stressors, including hypoxia  
316 and a viral mimetic.

### 317 318 **CITED2 and human trophoblast cell development**

319 There is supportive information connecting CITED2 to human placenta development and  
320 establishment of the EVT cell lineage. Partners in CITED2 action such as transcription factors (HIF1  
321 and TFAP2C) and CBP/EP300 have been implicated as regulators of human trophoblast cell  
322 biology and placental disease (13, 47–49). *CITED2* expression is also downregulated in  
323 preeclamptic placental tissue (50). These relationships implicating CITED2 in human placenta  
324 pathophysiology and the above experimentation demonstrating the involvement of CITED2 in rat  
325 placentation prompted an evaluation of CITED2 in human trophoblast cell development. *CITED2*  
326 was prominently expressed in cells constituting EVT cell columns from late first trimester human  
327 placentas (12-13 weeks) except for the *CDH1* and *NOTCH1* positive basal cytotrophoblast  
328 progenitor cell population (**Fig. 6A-C, SI Appendix Fig. S9**). *CITED2* transcripts co-localized with  
329 *NOTUM* (**Fig. 6D-F**), an EVT cell-enriched transcript (51), which was most prevalent in the distal  
330 region of the column (**Fig. 6E**). *CITED2* expression was also prominent in cells within a transition  
331 zone immediately proximal to the basal cytotrophoblast layer (**Fig. 6A-C**). These transition zone  
332 cells were negative for *NOTUM* (**Fig. D-F**). This places CITED2 in column locations critical for  
333 activation of the EVT cell differentiation program. The EVT cell column is a structure homologous  
334 to the junctional zone of the rat placentation site (**Fig. 1A**). EVT cell development can be effectively  
335 modeled in human TS cells (52). *CITED2* expression was significantly upregulated in EVT cells  
336 when compared to human TS cells maintained in the stem state, similar to the upregulation of *FLT4*  
337 and *NOTUM* (**Fig. 6G**). In contrast, *CITED2* transcripts decline following induction of  
338 syncytiotrophoblast differentiation (**SI Appendix Fig. S10A**). Expression of *CITED1*, a paralog of  
339 *CITED2* with some similar actions (10), in human TS cells was very low and declined following EVT  
340 cell differentiation (**SI Appendix Fig. S10B**). We next utilized shRNA mediated *CITED2* silencing  
341 to investigate the potential contributions of CITED2 to the regulation of EVT cell differentiation.  
342 Differentiation involves repression of transcripts associated with the stem cell state and activation  
343 of transcripts associated with the EVT cell state. CITED2 disruption effectively interfered with the  
344 expression of CITED2 (**Fig. 6H, SI Appendix Fig. S11A**) and was accompanied by morphologic  
345 impairments in EVT cell-specific elongation and instead, the presence of tightly packed cell colonies  
346 resembling the TS cell stem state (**Fig. 6I**). CITED2 knockdown also inhibited the movement of  
347 trophoblast cells through Matrigel-coated transwells, an in vitro measure of cell invasion (**Fig. 6J**).  
348 RNA-seq analysis of control and CITED2 knockdown cells indicated that CITED2 possesses roles  
349 in both acquisition of the EVT state and repression of the stem state (**Fig. 6K, SI Appendix Fig.**  
350 **S11B and C**). These observations were further confirmed by RT-qPCR measurement of transcripts  
351 associated with the EVT state (*FLT4* and *NOTUM*) and stem state (*NPPB* and *PEG10*) (**Fig. 6L**).  
352 Thus, CITED2 contributes to both repression of the TS cell stem state and acquisition of the EVT  
353 cell specific developmental program.

354

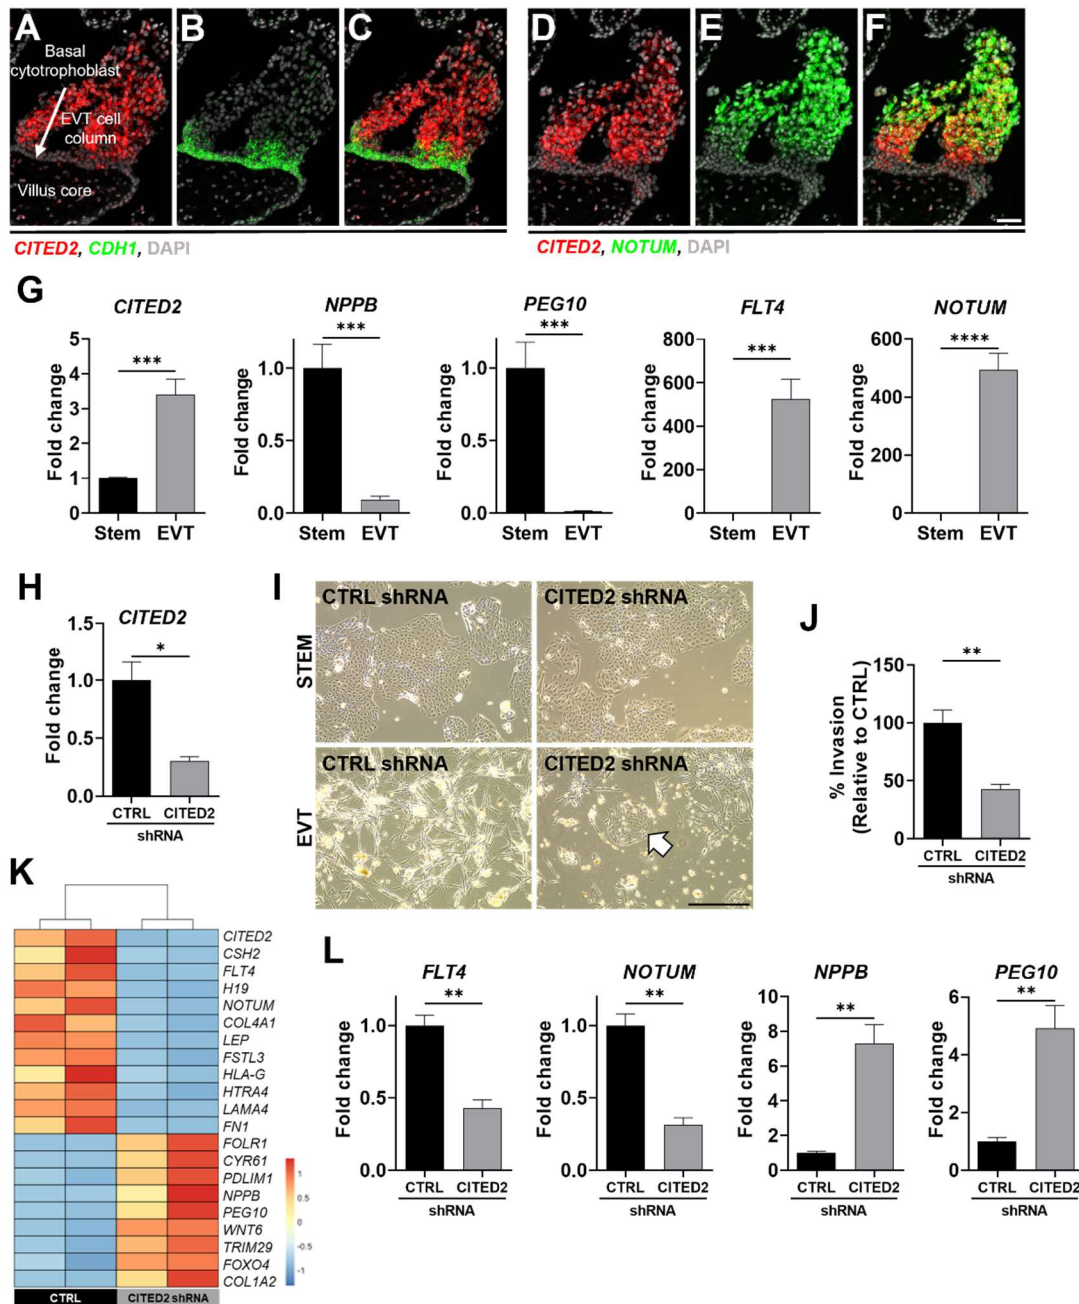

355

356

357

358

359

360

361

362

363

364

365

366

**Figure 6. CITED2 regulates human extravillous trophoblast (EVT) cell differentiation. A-F.** *In situ* hybridization showing *CITED2* transcript localization in first trimester (12 weeks) human placenta: *CITED2* (A, red), *CDH1* (B, green; marker of basal cytotrophoblast), *CITED2* and *CDH1* colocalization (C), *CITED2* (D, red), *NOTUM* (E, green; marker of EVT cells), *CITED2* and *NOTUM* colocalization (F). Scale bar=50  $\mu$ m. **G.** Relative expression of stem state cell signature transcripts (*NPPB*, *PEG10*), EVT cell signature transcripts (*FLT4* and *NOTUM*), and *CITED2* transcript in human TS cells in the stem state and following eight days of EVT cell differentiation, n=5. **H.** Relative expression of *CITED2* transcript levels in EVT cells expressing control (CTRL) or *CITED2* shRNAs, n=3. **I.** Phase-contrast images depicting cell morphology of stem and EVT differentiated cells expressing CTRL or *CITED2* shRNAs. White arrow is indicating a cluster of cells exhibiting stem-like morphology. Scale bar=500  $\mu$ m. **J.** Movement of human TS cells

367 through a Martigel coated transwell insert for cells expressing CTRL or CITED2 shRNAs. **K.**  
368 Heatmap showing select transcripts from RNA-seq analysis of human TS cells exposed to CTRL  
369 shRNA versus CITED2 shRNA during EVT cell differentiation. **L.** Relative expression of EVT cell  
370 signature transcripts (*FLT4* and *NOTUM*) and stem state cell signature transcripts (*NPPB*,  
371 *PEG10*) from human TS cells exposed to CTRL shRNA versus CITED2 shRNA during EVT cell  
372 differentiation, n=3. Graphs represent mean values  $\pm$  SEM, unpaired t-test, \*p<0.05, \*\*p <0.01,  
373 \*\*\*p <0.001, and \*\*\*\*p <0.0001.

374  
375

376 In summary, the data support the involvement of CITED2 in both rat and human deep placentation.

377  
378

## 379 Discussion

380

381 Placentation provides a means for the fetus to grow and develop in the female reproductive tract  
382 (1, 2). The structure of the mammalian placenta exhibits elements of species specificity (53, 54).  
383 However, it is also evident that there are conserved features associated with the regulation of  
384 placental development and placental function (3, 53). In this report, we provide data supporting a  
385 conserved role for CITED2 in the regulation of deep placentation in the rat and in the human.  
386 CITED2 regulates events influencing development of the junctional zone compartment of the rat  
387 placenta and EVT cell column of the human placenta and their cell derivatives, invasive  
388 trophoblast cells and EVT cells, respectively. Most interestingly, CITED2 also contributes to  
389 regulating the plasticity of the placenta and its responses to physiological stressors.

390

391 The mouse and rat *Cited2* null phenotypes showed elements of conservation but also unique  
392 features. Prenatal lethality, adrenal gland agenesis, and exencephaly are hallmarks of the *Cited2*  
393 null mouse (15, 16, 24), but were not observed in the *Cited2* null rat. Distinct features of mouse  
394 and rat *Cited2* null phenotypes may be attributable to species differences in the role of CITED2 in  
395 embryonic development or more specifically, species differences in roles for the transcription  
396 factors that CITED2 modulates. At this juncture, evidence is not available to determine whether  
397 CITED2 biology in the mouse or rat better reflects CITED2 biology in other species, including the  
398 human. The absence of conservation between the mouse and rat should be cautionary regarding  
399 extrapolating findings with mutant rodent models to human pathophysiology, especially without  
400 additional supportive information. In contrast, the placenta represented a conserved target for  
401 CITED2 action in the mouse, rat, and human. The prominent expression of CITED2 in the  
402 junctional zone and EVT cell column directed our attention to investigating a role for CITED2 in  
403 the biology of these placental structures and their derivatives, invasive trophoblast/EVT cells. In  
404 the mouse, CITED2 also contributes to the regulation of the junctional zone and its derivatives  
405 (22). Based on widespread expression of beta-galactosidase (**lacZ**) throughout the mouse  
406 placenta in a *Cited2-lacZ* knock-in mouse model (22), CITED2 function was also investigated in  
407 the labyrinth zone (23). Cell specific trophoblast *Cited2* disruption supported a role for CITED2 in  
408 trophoblast cell-capillary patterning and transport (23). Although a growth restricted labyrinth zone  
409 was noted in the *Cited2* null rat, the absence, or potentially low levels, of CITED2 in the labyrinth  
410 zone implied that CITED2 was acting on the labyrinth zone in a non-cell autonomous role. The  
411 actions of CITED2 in the mouse labyrinth zone may represent another example of species-  
412 specificity of CITED2 action and could be responsible for the prenatal lethality observed in the  
413 *Cited2* null mouse.

414

415 Current evidence indicates that CITED2 acts as a co-regulator, modulating the recruitment of  
416 H3K27 acetyltransferases, CBP/EP300, to specific transcription factors controlling gene  
417 transcription (10). These actions can promote or inhibit CBP/EP300-transcription factor  
418 interactions and, thus, CITED2 can serve as a facilitator of gene activation or gene repression  
419 (15, 16). TFAP2C, peroxisome proliferator activating receptor gamma (**PPARG**) and HIF1 are  
420 transcription factors affected by CITED2 (15, 16, 55) with known actions on trophoblast cell

421 development and placentation (18, 20, 21, 56). The data are consistent with CITED2 promoting  
422 placental development through stimulating transcriptional activities of transcription factors, such  
423 as TFAP2C and PPARG, and dampening placental responses to physiological stressors. CITED2  
424 may modulate placental adaptations to hypoxia through its established role in restraining HIF-  
425 mediated transcription (15). Linkages between CITED2 and transcription factors implicated in  
426 placentation with responses to poly I:C are not evident. However, CITED2 is an established  
427 inhibitor of immune/inflammatory responses mediated by nuclear factor kappa B (45, 57) and  
428 signal transducer activator of transcription 1/interferon regulatory factor 1 (46), which could  
429 contribute to placental responses to the viral mimetic, polyI:C. CITED2 should also be viewed as  
430 an access point to other CBP/EP300-transcription factor interactions not previously known to  
431 contribute to the regulation of placentation or adaptations to physiological stressors. It is also  
432 important to appreciate that CITED2 is likely not acting as an on/off switch but instead may  
433 function as a rheostat to modulate the range of actions of specific transcription factor-CBP/EP300  
434 interactions.

435  
436 CITED2 is a member of a family of transcriptional co-regulators that in mammals also includes  
437 CITED1 and CITED4 (10). CITED1 is a known regulator of placentation in the mouse (58).  
438 Connections between CITED4 and placentation have not been described. Expression profiles of  
439 CITED1 and CITED2 in the mouse placenta overlap (22, 23, 58), as does their interaction with  
440 CBP/EP300 and transcription factors (10). Germline disruption of either *Cited1* or *Cited2* in the  
441 mouse results in abnormal placentation, with altered junctional zone morphogenesis (22, 23, 58).  
442 However, their impacts on junctional zone development differ. *Cited1* null placentas showed an  
443 expansion of the junctional zone (58), whereas *Cited2* null placentas exhibited junctional zone  
444 growth restriction (22). Thus, how CITED1 and CITED2 cooperate to promote normal junctional  
445 zone morphogenesis is yet to be determined. We also presented evidence for the involvement of  
446 CITED2 in human EVT cell development but have not observed significant CITED1 expression in  
447 human TS cells or their derivatives (52). Thus, there may be a species difference in the utilization  
448 of CITED family members as regulators of placental development. Rodents require two CITED  
449 family members (CITED1 and CITED2) for normal placental morphogenesis, whereas trophoblast  
450 cell lineage development in the human may only involve CITED2.

451  
452 CITED2 contributes to the regulation of the invasive trophoblast/EVT cell lineage in both the rat  
453 and human. The invasive trophoblast/EVT cell lineage is critical to the establishment of a healthy  
454 hemochorial placenta (3, 4). These cells have a key role in transforming the uterus into a milieu  
455 supportive of placental and fetal development (3, 4). Their position within the uterine parenchyma  
456 and ability to adapt to physiological stressors are fundamental to a successful pregnancy.  
457 Disruptions in development and/or functioning of the invasive trophoblast/EVT cell lineage lead to  
458 pregnancy-related diseases, including preeclampsia, intrauterine growth restriction, and pre-term  
459 birth (59). CITED2 dysregulation has been linked to preeclampsia (50). Further interrogation of  
460 the CITED2 gene regulatory network in rat and human invasive trophoblast/EVT cells will provide  
461 insights into important developmental and pathophysiologic processes affecting hemochorial  
462 placentation and pregnancy.

463

464

## 465 **Materials and Methods**

466

### 467 **Animals**

468 Holtzman Sprague-Dawley rats were purchased from Envigo. A CITED2 deficient mouse model  
469 (15) was a gift from Dr. Yu-Chung Yang of Case Western Reserve University (Cleveland, OH).  
470 The *Cited2* mutation was moved to a CD1 mouse genetic background following >10 generations  
471 of backcrossing. Animals were maintained in a 14 h light:10 h dark cycle (lights on at 0600 h) with  
472 food and water available ad libitum. Timed pregnancies were established by cohabiting female  
473 and male rats or mice. Mating was determined by the presence of a seminal plug or sperm in the  
474 vaginal lavage for the rat and the presence of a seminal plug in the vagina for the mouse and



475 considered gd 0.5. Pseudopregnant female rats were generated by mating with vasectomized  
476 males. Detection of seminal plugs was considered day 0.5 of pseudopregnancy.

477

478 **Hypoxia exposure.** Pregnant rats were placed in a ProOX P110 gas-regulated chamber  
479 (BioSpherix) to generate a hypoxic environment [10.5% (vol/vol) oxygen] from gd 6.5 to 13.5 or  
480 gd 6.5 to 18.5 as previously described (60). Pregnant rats exposed to ambient conditions [~21%  
481 (vol/vol) oxygen] were used as controls. Animals were euthanized at the termination of the  
482 exposures and placentation sites collected.

483

484 **Poly I:C exposure.** Pregnant rats were intraperitoneally injected with poly I:C (10 mg/kg body  
485 weight, P1530-25MG, Sigma-Aldrich) on gd 13.5. Animals were euthanized 6 h following injection  
486 and placentation sites collected.

487

488 The University of Kansas Medical Center (**KUMC**) Animal Care and Use Committee approved all  
489 protocols involving the use of animals.

490

#### 491 **Tissue collection and analysis**

492 Rats and mice were euthanized by CO<sub>2</sub> asphyxiation at designated days of gestation. The health  
493 and viability of placentation sites and fetuses were determined. Uterine segments containing  
494 placentation sites and fetuses were frozen in dry ice-cooled heptane and stored at -80°C until  
495 used for histological analyses. Alternatively, placentation sites were dissected. Placentas, the  
496 adjacent uterine-placental interface tissue (also referred to as the metrial gland), and fetuses  
497 were isolated as previously described (61). Placentas were weighed and dissected into placental  
498 compartments (junctional and labyrinth zones) (61) and frozen in liquid nitrogen and stored at  
499 -80°C until used for biochemical analyses. Fetuses were assessed for viability and morphological  
500 defects, weighed, and genotyped, and sex determined by PCR (62). Tissues from E15.5 rat  
501 fetuses and postnatal day 1 (**PND1**) newborns were dissected, fixed (E15.5 fetuses: 10% neutral  
502 buffered formalin solution; PND1 newborn tissues: 4% paraformaldehyde, **PFA**, in phosphate  
503 buffered saline, pH 7.4, **PBS**) and prepared for histological/immunohistochemical analyses.  
504 Mouse E17.5 fetal tissues were fixed in 10% neutral buffered formalin solution and tissues  
505 dissected.

506

507 Paraffin-embedded human placental tissues were obtained from the Research Centre for  
508 Women's and Children's Health Biobank (Mount Sinai Hospital, Toronto). Tissues were  
509 deidentified and collected following consent and approved by the University of Toronto and the  
510 KUMC human research ethics review committees.

511

#### 512 **Generation of a *Cited2* null rat model**

513 *CRISPR/Cas9* genome editing was utilized to generate a *CITED2* deficient rat according to  
514 procedures previously described (63). E0.5 zygotes were microinjected with guide RNAs  
515 targeting the entire coding region of the *Cited2* locus and Cas9 (**SI Appendix Fig. S1A; Table**  
516 **S2**). Injected embryos were transferred to pseudopregnant rats. Offspring were screened for  
517 mutations by PCR and verified by DNA sequencing. Founder rats possessing mutations within  
518 the *Cited2* locus were backcrossed to wild type rats to confirm germline transmission.

519

#### 520 **Genotyping and fetal sex determination**

521 Genotyping was performed using DNA extracted from tail-tip biopsies. DNA was purified with  
522 RedExtract-N-Amp tissue PCR kit (XNAT-1000RXN, Sigma-Aldrich) using directions provided by  
523 the manufacturer. For rat *Cited2* genotyping, three primers were used to distinguish between wild  
524 type and mutant *Cited2* loci (**SI Appendix Fig. S1B**). The sequences of these primers are  
525 provided in **SI Appendix Table S3**. For mouse genotyping, PCR was used to detect the  
526 neomycin resistance gene, which replaced Exon 1 and part of Exon 2 of the mouse *Cited2* gene  
527 (**SI Appendix Fig. S1D**) (15). Primer sequences for mouse *Cited2* genotyping are provided in  
528 **Table S3**. Sex of rat fetuses was determined by PCR on genomic DNA for *Kdm5c* (X

529 chromosome) and *Kdm5d* (Y chromosome), using primers detailed in **SI Appendix Table S3**, as  
530 previously described (62).

531

### 532 **Rat blastocyst-derived TS cell culture**

533 Wild type and *Cited2* null rat TS cells were established, maintained, and differentiated using a  
534 previously described procedure (36). Rat TS cells were maintained in Rat TS Cell Stem State  
535 Medium (RPMI-1640 culture medium (11875093, Thermo Fisher) containing 20% fetal bovine  
536 serum (**FBS**, F2442, Sigma-Aldrich), 50  $\mu$ M 2-mercaptoethanol (**2ME**, M3148, Sigma-Aldrich), 1  
537 mM sodium pyruvate (11360070, Thermo Fisher), 100 U/ml penicillin, and 100  $\mu$ g/ml  
538 streptomycin (15140122, Thermo Fisher), fibroblast growth factor 4 (**FGF4**, 25 ng/ml, 100-31,  
539 PeproTech), heparin (1  $\mu$ g/ml, H3149, Sigma-Aldrich), and rat embryonic fibroblast-conditioned  
540 medium (70% of the final volume)), as previously reported (36).

541

542 Proliferation was assessed in wild type and *Cited2* null TS cells using a colorimetric assay. Wild  
543 type and *Cited2* null TS cells were plated at 1000 cells/well in 96-well cell culture treated plates.  
544 After 24, 48 and 72 h, medium was removed, cells were stained with crystal violet solution (0.4 %  
545 in methanol, C-3886, Sigma-Aldrich) for 10 min, and excess stain washed. Methanol was added  
546 to each well, incubated for 20 min and absorbance measured at 570 nm. Proliferation was  
547 expressed as fold change to 24 h values.

548

549 Differentiation was induced by the removal of FGF4, heparin, and rat embryonic fibroblast-  
550 conditioned medium, and decreasing the FBS concentration to 1%. Rat TS cells were  
551 differentiated for 12 days.

552

### 553 **Human TS cell culture**

554 Human TS cells used in the experimentation have been previously described (52). The cells  
555 originated from deidentified first trimester human placental tissue obtained from healthy women  
556 with signed informed consent and approval from the Ethics Committee of Tohoku University  
557 School of Medicine. Experimentation with human TS cells was approved by the KUMC Human  
558 Research Protection Program and the KUMC Human Stem Cell Research Oversight committee.  
559 Human TS cells were maintained and differentiated into EVT cells using a previously described  
560 procedure (52). Detailed culture conditions are provided in the **SI Appendix**.

561

### 562 **shRNA constructs and production of lentiviral particles**

563 Generation of shRNA-mediated *loss-of-function* models are described in the **SI Appendix**.  
564 shRNA sequences are included in **SI Appendix Table S4**.

565

### 566 **In vivo lentiviral transduction**

567 Rat embryos were transduced with lentiviral particles as previously described (35). Lentiviral  
568 vector titers were determined by measurement of p24 Gag antigen by an enzyme-linked  
569 immunosorbent assay (Advanced Bioscience Laboratories). Briefly, blastocysts collected on gd  
570 4.5 were incubated in Acid Tyrode's Solution (EMD-Millipore) to remove zona pellucidae and  
571 incubated with concentrated lentiviral particles (750 ng of p24/mL) for 4.5 h. Transduced  
572 blastocysts were transferred to uteri of day 3.5 pseudopregnant rats for subsequent evaluation of  
573 *Cited2* knockdown and placentation site phenotypes (**Fig. 2D**).

574

### 575 **In vitro lentiviral transduction**

576 Human TS cells were plated at 50,000 cells per well in 6-well tissue culture-treated plates coated  
577 with 5  $\mu$ g/mL collagen IV and incubated for 24 h. Lenti-X 293T cells were plated at 300,000 cells  
578 per well in 6-well tissue culture-treated plates coated with poly-L-lysine solution in PBS (0.001 %).  
579 Just before transduction, medium was changed, and cells were incubated with 2.5  $\mu$ g/mL  
580 polybrene for 30 min at 37 °C. Immediately following polybrene incubation, cells were transduced  
581 with 500  $\mu$ L of lentiviral particle containing supernatant and then incubated overnight. On the next

582 day, medium was changed, and cells were allowed to recover for 24 h. Cells were selected with  
583 puromycin dihydrochloride (5 µg/mL, A11138-03, Thermo Fisher) for two days.

584

#### 585 **Transient transfection**

586 Lenti-X 293T cells were transiently transfected with a CITED2 (NM\_001168388) human c-Myc  
587 and DYKDDDDK (**DDK**) tagged open reading frame clone (RC229801, Origene) using Attractene  
588 in DMEM medium supplemented with 100 U/ml penicillin, and 100 µg/ml streptomycin. On the  
589 next day, medium was replaced with fresh DMEM medium supplemented with 10% FBS, 100  
590 U/ml penicillin, and 100 µg/ml streptomycin. Lysates were collected 48 h post-transfection.

591

#### 592 **Matrigel invasion assay**

593 Cell migration through extracellular matrices was assessed using Matrigel-coated transwells. A  
594 description of the invasion assay is provided in the **SI Appendix**.

595

#### 596 **Histological and immunohistochemical analyses**

597 Wild type and *Cited2* null fetal, postnatal, and placental tissues were utilized for histological and  
598 immunohistochemical analyses. Protocols for assessing rat fetal development and placentation  
599 sites are presented in the **SI Appendix**.

600

601

#### 602 **In situ hybridization**

603 *Cited2* transcripts in rat and human placental tissues were detected by in situ hybridization using  
604 the RNAscope® Multiplex Fluorescent Reagent Kit version 2 (Advanced Cell Diagnostics),  
605 according to the manufacturer's instructions. Probes were prepared to detect rat *Cited2* (461431,  
606 NM\_053698.2, target region: 2-1715), rat *Ceacam9* (1166771, NM\_053919.2, target region: 130-  
607 847), rat *Prl7b1* (860181, NM\_153738.1, target region: 28-900), human *CITED2* (454641,  
608 NM\_006079.4, target region: 215-1771), human *CDH1* (311091, NM\_004360.3, target region:  
609 263-1255), human *NOTCH1* (311861, NM\_017617.3, target region: 1260-2627), and human  
610 *NOTUM* (430311, NM\_178493.5, target region: 259-814). Images were captured on Nikon 80i or  
611 90i upright microscopes (Nikon) with Photometrics CoolSNAP-ES monochrome cameras (Roper).

612

#### 613 **Western blotting**

614 CITED2 protein in rat junctional zone tissue and DYKDDDDK (**DDK**)-tagged CITED2 protein from  
615 transfected Lenti-X 293T cells were assessed by western blotting. Information about the  
616 procedures is provided in the **SI Appendix**.

617

#### 618 **RT-qPCR**

619 Total RNA was extracted by homogenizing tissues in TRIzol (15596018, Thermo Fisher),  
620 according to the manufacturer's instructions. Purified RNA (1 µg) was used for reverse  
621 transcription using the High-Capacity cDNA Reverse Transcription kit (4368814, Applied  
622 Biosystems). Complementary DNA (**cdNA**) was diluted 1:10 and subjected to qPCR using  
623 PowerSYBR Green PCR Master Mix (4367659, Thermo Fisher), primers listed in **SI Appendix**  
624 **Table S5**, and the QuantStudio 5 Real Time PCR system (Thermo Fisher). Cycling conditions  
625 were as follows: an initial holding step (50°C for 2 min, 95°C for 10 min), followed by 40 cycles of  
626 two-step PCR (95°C for 15 s, 60°C for 1 min), and then a dissociation step (95°C for 15 s, 60°C  
627 for 1 min, and a sequential increase to 95°C for 15 s). Relative mRNA expression was calculated  
628 using the  $\Delta\Delta C_t$  method. Glyceraldehyde 3-phosphate dehydrogenase (*Gapdh*) was used as a  
629 reference RNA for rat samples and *POLR2A* was used for human samples.

630

#### 631 **RNA-seq**

632 Tissue from junctional zone compartments of gd 14.5 wild type and *Cited2* null placentas and  
633 control and *CITED2* knockdown human TS cells were collected and processed for RNA-seq  
634 analysis. RNA was extracted using TRIzol, according to the manufacturer's instructions. cDNA  
635 libraries were prepared with Illumina TruSeq RNA sample preparation kits (RS-122-2002,

636 Illumina). RNA integrity was assessed using an Agilent 2100 Bioanalyzer (cutoff value of RIN 8 or  
637 higher; Agilent Technologies). cDNA libraries were clustered onto a TruSeq paired-end flow cell,  
638 and sequenced (100 bp paired-end reads) using a TruSeq 200 cycle SBS kit (Illumina). Samples  
639 were run on an Illumina HiSeq2000 sequencer (tissue specimens) or Illumina NovaSeq 6000  
640 (cells) located at the KUMC Genome Sequencing facility and sequenced in parallel with other  
641 samples to ensure the data generated for each run were accurately calibrated during data  
642 analysis. Reads from \*.fastq files were mapped to the rat reference genome (*Rattus norvegicus*  
643 reference genome Rnor\_6.0) or the human reference genome (*Homo sapiens* reference genome  
644 GRCh37) using CLC Genomics Workbench 20.0.4 (Qiagen). Only reads with <2 mismatches and  
645 minimum length and a similarity fraction of 0.8 were mapped to the reference genome. The  
646 mRNA abundance was expressed in reads per kilobase of exon per million reads mapped  
647 (**RPKM**). A p-value of 0.05 was used as a cutoff for significant differential expression. Functional  
648 patterns of transcript expression were further analyzed using Metascape (64).

649

#### 650 **scRNA-seq**

651 Uterine-placental interface tissues were dissected from gd 18.5 placentation sites (61), minced  
652 into small pieces, and enzymatically digested into a cell suspension for scRNA-seq as previously  
653 described (40, 63). Samples were then processed using Chromium Single Cell RNA-seq (10X  
654 Genomics) and libraries prepared using the Chromium Single Cell 3' kit (10x Genomics). Library  
655 preparation and DNA sequencing using a NovaSeq 6000 sequencer (Illumina) were performed by  
656 the KUMC Genome Sequencing facility. scRNA-seq data analysis was performed as previously  
657 described (63). Briefly, the RNA sequencing data was initially processed and analyzed using the  
658 Cell Ranger pipeline. The Seurat data pipeline (version 3.1.5) was used for additional data  
659 analysis, including identification of differentially expressed genes using *FindMarkers* (65).

660

661

#### 662 **Statistical analysis**

663 Statistical analyses were performed with GraphPad Prism 9 software. Statistical comparisons  
664 were evaluated using Student's *t* test or one-way analysis of variance with Tukey's post hoc test  
665 as appropriate. Statistical significance was determined as  $p < 0.05$ .

666

667

#### 668 **Data and materials availability**

669 All raw and processed sequencing data generated in this study have been submitted to the NCBI  
670 Gene Expression Omnibus (**GEO**) under the following accession number GSE202339. The  
671 *CITED2* mutant rat model is available through the Rat Resource and Research Center (Columbia,  
672 MO).

673

674

#### 675 **Acknowledgments**

676 We thank Dr. Yu-Chung Yang of Case Western Reserve University (Cleveland, OH) for providing  
677 the *Cited2* mutant mouse model. We also thank Stacy Oxley and Brandi Miller for administrative  
678 assistance.

679

680

#### 681 **Funding**

682 The research was supported by postdoctoral fellowships from the KUMC Biomedical Training  
683 Program (MK, EMD, KMV), Kansas Idea Network of Biomedical Research Excellence, P20  
684 GM103418 (MK, EMD, AM-I), Lalor Foundation (PD, MM, KMV, EMD, AM-I, KK), American Heart  
685 Association (MM, KK), and an NIH National Research Service Award, HD096809 (KMV) and NIH  
686 grants (HD020676, HD079363, HD099638, HD105734), and the Sosland Foundation.

687

688

#### 689 **References**



690

- 691 1. E. Maltepe, S. J. Fisher, Placenta: the forgotten organ. *Annu Rev Cell Dev Biol* **31**, 523–  
692 552 (2015).
- 693 2. G. J. Burton, A. L. Fowden, K. L. Thornburg, Placental origins of chronic disease. *Physiol*  
694 *Rev* **96**, 1509–1565 (2016).
- 695 3. M. J. Soares, K. Varberg, K. Iqbal, Hemochorial placentation: development, function, and  
696 adaptations. *Biol Reprod* (2018).
- 697 4. M. Knöfler, *et al.*, Human placenta and trophoblast development: key molecular  
698 mechanisms and model systems. *Cell Mol Life Sci* **76**, 3479–3496 (2019).
- 699 5. R. Pijnenborg, W. B. Robertson, I. Brosens, G. Dixon, Trophoblast invasion and the  
700 establishment of haemochorial placentation in man and laboratory animals. *Placenta* **2**,  
701 71–91 (1981).
- 702 6. M. J. Soares, D. Chakraborty, M. A. K. Rumi, T. Konno, S. J. Renaud, Rat placentation:  
703 An experimental model for investigating the hemochorial maternal-fetal interface. *Placenta*  
704 **33**, 233–243 (2012).
- 705 7. V. Shukla, M. J. Soares, Modeling Trophoblast Cell-Guided Uterine Spiral Artery  
706 Transformation in the Rat. *Int J Mol Sci* **23**, 2947 (2022).
- 707 8. D. G. Simmons, J. C. Cross, Determinants of trophoblast lineage and cell subtype  
708 specification in the mouse placenta. *Dev Biol* **284**, 12–24 (2005).
- 709 9. B. An, X. Ji, Y. Gong, Role of CITED2 in stem cells and cancer. *Oncol Lett* **20**, 1–1 (2020).
- 710 10. J. Bragança, L. Mendes-Silva, J. A. Lopes, S. M. Calado, CITED proteins in the heart of  
711 pluripotent cells and in heart's full potential. *Regen Med Front* **1**, e3190005 (2019).
- 712 11. E. Kalkhoven, CBP and p300: HATs for different occasions. *Biochem Pharmacol* **68**,  
713 1145–1155 (2004).
- 714 12. A. K. Voss, T. Thomas, Histone lysine and genomic targets of histone acetyltransferases  
715 in mammals. *Bioessays* **40**, e1800078 (2018).
- 716 13. M. van Uitert, *et al.*, Meta-analysis of placental transcriptome data identifies a novel  
717 molecular pathway related to preeclampsia. *PLoS One* **10**, e0132468 (2015).
- 718 14. N. D. Paauw, *et al.*, H3K27 acetylation and gene expression analysis reveals differences  
719 in placental chromatin activity in fetal growth restriction. *Clin Epigenetics* **10**, 85 (2018).
- 720 15. Z. Yin, *et al.*, The essential role of Cited2, a negative regulator for HIF-1alpha, in heart  
721 development and neurulation. *Proc Natl Acad Sci USA* **99**, 10488–10493 (2002).
- 722 16. S. D. Bamforth, *et al.*, Cardiac malformations, adrenal agenesis, neural crest defects and  
723 exencephaly in mice lacking Cited2, a new Tfap2 co-activator. *Nat Genet* **29**, 469–474  
724 (2001).
- 725 17. D. M. Adelman, M. Gertsenstein, A. Nagy, M. C. Simon, E. Maltepe, Placental cell fates  
726 are regulated in vivo by HIF-mediated hypoxia responses. *Genes Dev* **14**, 3191–3203  
727 (2000).
- 728 18. H. J. Auman, *et al.*, Transcription factor AP-2gamma is essential in the extra-embryonic  
729 lineages for early postimplantation development. *Development* **129**, 2733–2747 (2002).
- 730 19. U. Werling, H. Schorle, Transcription factor gene AP-2gamma essential for early murine  
731 development. *Mol Cell Biol* **22**, 3149–3156 (2002).
- 732 20. K. D. Cowden Dahl, *et al.*, Hypoxia-inducible factors 1alpha and 2alpha regulate  
733 trophoblast differentiation. *Mol Cell Biol* **25**, 10479–10491 (2005).
- 734 21. N. Sharma, *et al.*, Tpbpa-Cre-mediated deletion of TFAP2C leads to deregulation of  
735 Cdkn1a, Akt1 and the ERK pathway, causing placental growth arrest. *Development* **143**,  
736 787–798 (2016).
- 737 22. S. L. Withington, *et al.*, Loss of Cited2 affects trophoblast formation and vascularization of  
738 the mouse placenta. *Dev Biol* **294**, 67–82 (2006).
- 739 23. J. L. M. Moreau, *et al.*, Cited2 is required in trophoblasts for correct placental capillary  
740 patterning. *Dev Biol* **392**, 62–79 (2014).
- 741 24. J. P. M. Barbera, *et al.*, Folic acid prevents exencephaly in Cited2 deficient mice. *Hum Mol*  
742 *Genet* **11**, 283–293 (2002).

- 743 25. L. N. Kent, T. Konno, M. J. Soares, Phosphatidylinositol 3 kinase modulation of  
744 trophoblast cell differentiation. *BMC Dev Biol* **10**, 97 (2010).
- 745 26. K. Imakawa, *et al.*, CITED2 modulation of trophoblast cell differentiation: insights from  
746 global transcriptome analysis. *Reproduction* **151**, 509–516 (2016).
- 747 27. D. O. Wiemers, R. Ain, S. Ohboshi, M. J. Soares, Migratory trophoblast cells express a  
748 newly identified member of the prolactin gene family. *J Endocrinol* **179**, 335–346 (2003).
- 749 28. B. Xu, *et al.*, Cited2 is required for fetal lung maturation. *Dev Biol* **317**, 95–105 (2008).
- 750 29. K. Lopes Floro, *et al.*, Loss of Cited2 causes congenital heart disease by perturbing left–  
751 right patterning of the body axis. *Hum Mol Genet* **20**, 1097–1110 (2011).
- 752 30. S. M. Savolainen, J. F. Foley, S. A. Elmore, Histology atlas of the developing mouse heart  
753 with emphasis on E11.5 to E18.5. *Toxicol Pathol* **37**, 395–414 (2009).
- 754 31. E. J. Camm, K. J. Botting, A. N. Sferruzzi-Perri, Near to One’s Heart: The Intimate  
755 Relationship Between the Placenta and Fetal Heart. *Front Physiol* **9**, 629 (2018).
- 756 32. V. Perez-Garcia, *et al.*, Placentation defects are highly prevalent in embryonic lethal  
757 mouse mutants. *Nature* **555**, 463–468 (2018).
- 758 33. J. A. Courtney, J. F. Cnota, H. N. Jones, The Role of Abnormal Placentation in Congenital  
759 Heart Disease; Cause, Correlate, or Consequence? *Front Physiol* **9**, 1045 (2018).
- 760 34. M. O’Reilly, B. Thébaud, Animal models of bronchopulmonary dysplasia. The term rat  
761 models. *Am J Physiol Lung Cell Mol Physiol* **307**, L948–L958 (2014).
- 762 35. D.-S. Lee, M. A. K. Rumi, T. Konno, M. J. Soares, In vivo genetic manipulation of the rat  
763 trophoblast cell lineage using lentiviral vector delivery. *Genesis* **47**, 433–439 (2009).
- 764 36. K. Asanoma, *et al.*, FGF4-dependent stem cells derived from rat blastocysts differentiate  
765 along the trophoblast lineage. *Dev Biol* **351**, 110–119 (2011).
- 766 37. V. Plaks, *et al.*, Matrix metalloproteinase-9 deficiency phenocopies features of  
767 preeclampsia and intrauterine growth restriction. *Proc Natl Acad Sci U S A* **110**, 11109–  
768 11114 (2013).
- 769 38. R. W. Redline, C. L. Chernicky, H. Q. Tan, J. Ilan, J. Ilan, Differential expression of insulin-  
770 like growth factor-II in specific regions of the late (post day 9.5) murine placenta. *Mol*  
771 *Reprod Dev* **36**, 121–129 (1993).
- 772 39. R. Ain, L. N. Canham, M. J. Soares, Gestation stage-dependent intrauterine trophoblast  
773 cell invasion in the rat and mouse: novel endocrine phenotype and regulation. *Dev Biol*  
774 **260**, 176–190 (2003).
- 775 40. R. L. Scott, *et al.*, Conservation at the uterine-placental interface. *Proc Natl Acad Sci U S*  
776 *A* **119**, e2210633119 (2022).
- 777 41. X. Guan, X. Guan, C. Dong, Z. Jiao, Rho GTPases and related signaling complexes in cell  
778 migration and invasion. *Exp Cell Res* **388**, 111824 (2020).
- 779 42. P. Velicky, *et al.*, Pregnancy-associated diamine oxidase originates from extravillous  
780 trophoblasts and is decreased in early-onset preeclampsia. *Sci Rep* **8**, 6342 (2018).
- 781 43. G. X. Rosario, T. Konno, M. J. Soares, Maternal hypoxia activates endovascular  
782 trophoblast cell invasion. *Dev Biol* **314**, 362–375 (2008).
- 783 44. K. J. Baines, *et al.*, Antiviral inflammation during early pregnancy reduces placental and  
784 fetal growth trajectories. *J Immunol* **204**, 694–706 (2020).
- 785 45. X. Lou, *et al.*, Negative feedback regulation of NF- $\kappa$ B action by CITED2 in the nucleus. *J*  
786 *Immunol* **186**, 539–548 (2011).
- 787 46. A. Zafar, *et al.*, CITED2 inhibits STAT1-IRF1 signaling and atherogenesis. *FASEB J.* **35**,  
788 e21833 (2021).
- 789 47. A. K. Wakeland, *et al.*, Hypoxia directs human extravillous trophoblast differentiation in a  
790 hypoxia-inducible factor-dependent manner. *Am J Pathol* **187**, 767–780 (2017).
- 791 48. C. Krendl, *et al.*, GATA2/3-TFAP2A/C transcription factor network couples human  
792 pluripotent stem cell differentiation to trophoblast with repression of pluripotency. *Proc*  
793 *Natl Acad Sci USA* **114**, E9579–E9588 (2017).
- 794 49. B. D. Solomon, *et al.*, Expanding the phenotypic spectrum in EP300-related Rubinstein–  
795 Taybi syndrome. *Am J Med Genet A* **167A**, 1111–1116 (2015).

- 796 50. H. Nishizawa, *et al.*, Microarray analysis of differentially expressed fetal genes in placental  
797 tissue derived from early and late onset severe pre-eclampsia. *Placenta* **28**, 487–497  
798 (2007).
- 799 51. J. F. Robinson, *et al.*, Transcriptional Dynamics of Cultured Human Villous  
800 Cytotrophoblasts. *Endocrinology* **158**, 1581–1594 (2017).
- 801 52. H. Okae, *et al.*, Derivation of human trophoblast stem cells. *Cell Stem Cell* **22**, 50-63.e6  
802 (2018).
- 803 53. F. Soncin, D. Natale, M. M. Parast, Signaling pathways in mouse and human trophoblast  
804 differentiation: a comparative review. *Cell Mol Life Sci* **72**, 1291–1302 (2015).
- 805 54. R. M. Roberts, J. A. Green, L. C. Schulz, The evolution of the placenta. *Reproduction* **152**,  
806 R179–R189 (2016).
- 807 55. E. S. Tien, J. W. Davis, J. P. Vanden Heuvel, Identification of the CREB-binding  
808 protein/p300-interacting protein CITED2 as a peroxisome proliferator-activated receptor  
809 alpha coregulator. *J Biol Chem* **279**, 24053–24063 (2004).
- 810 56. Y. Barak, Y. Sadovsky, T. Shalom-Barak, PPAR signaling in placental development and  
811 function. *PPAR Res* **2008**, e142082 (2007).
- 812 57. H. Pong Ng, G.-D. Kim, E. Ricky Chan, S. L. Dunwoodie, G. H. Mahabeleshwar, CITED2  
813 limits pathogenic inflammatory gene programs in myeloid cells. *FASEB J* **34**, 12100–  
814 12113 (2020).
- 815 58. T. A. Rodriguez, *et al.*, Cited1 is required in trophoblasts for placental development and for  
816 embryo growth and survival. *Mol Cell Biol* **24**, 228–244 (2004).
- 817 59. I. Brosens, P. Puttemans, G. Benagiano, Placental bed research: I. The placental bed:  
818 from spiral arteries remodeling to the great obstetrical syndromes. *Am J Obstet Gynecol*  
819 **221**, 437–456 (2019).
- 820 60. D. Chakraborty, R. L. Scott, M. J. Soares, Hypoxia signaling and placental adaptations.  
821 *Methods Mol Biol* **1742**, 167–183 (2018).
- 822 61. R. Ain, T. Konno, L. N. Canham, M. J. Soares, Phenotypic analysis of the rat placenta.  
823 *Methods Mol Med* **121**, 295–313 (2006).
- 824 62. P. Dhakal, M. J. Soares, Single-step PCR-based genetic sex determination of rat tissues  
825 and cells. *Biotechniques* **62**, 232–233 (2017).
- 826 63. K. Iqbal, *et al.*, Evaluation of placentation and the role of the aryl hydrocarbon receptor  
827 pathway in a rat model of dioxin exposure. *Environ Health Perspect* **129**, 117001 (2021).
- 828 64. Y. Zhou, *et al.*, Metascape provides a biologist-oriented resource for the analysis of  
829 systems-level datasets. *Nat Commun* **10**, 1523 (2019).
- 830 65. T. Stuart, *et al.*, Comprehensive integration of single-cell data. *Cell* **177**, 1888-1902.e21  
831 (2019).
- 832
